# Supplementary material for: The structural basis for Ras activation of PI3Kα lipid kinase
Source: Royal Society of Chemistry journal article supplement (doi:10.1039/c9cp00101h), 2019-01-01

**Figure S1.** The point mutation of T208D results in the conformational change in  $\beta 2$  region of PI3K $\alpha$ -RBD, disrupting the KRas4B-RBD interface.

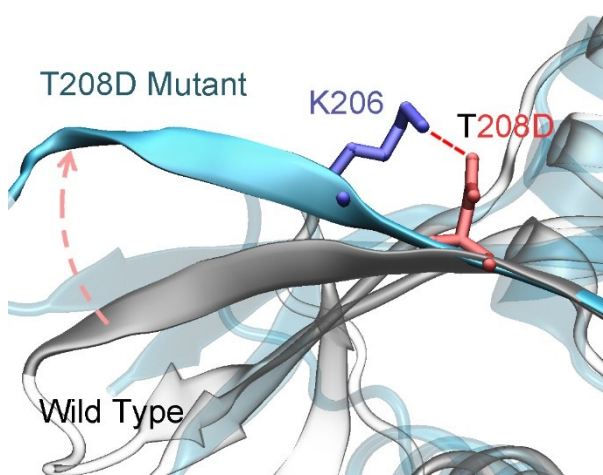

**Figure S2.** The distance profiles for backbone hydrogen bonds at the antiparallel  $\beta$ -sheet interface in mutated KRas4B-PI3K $\alpha$ -RBD (R230E) complex.

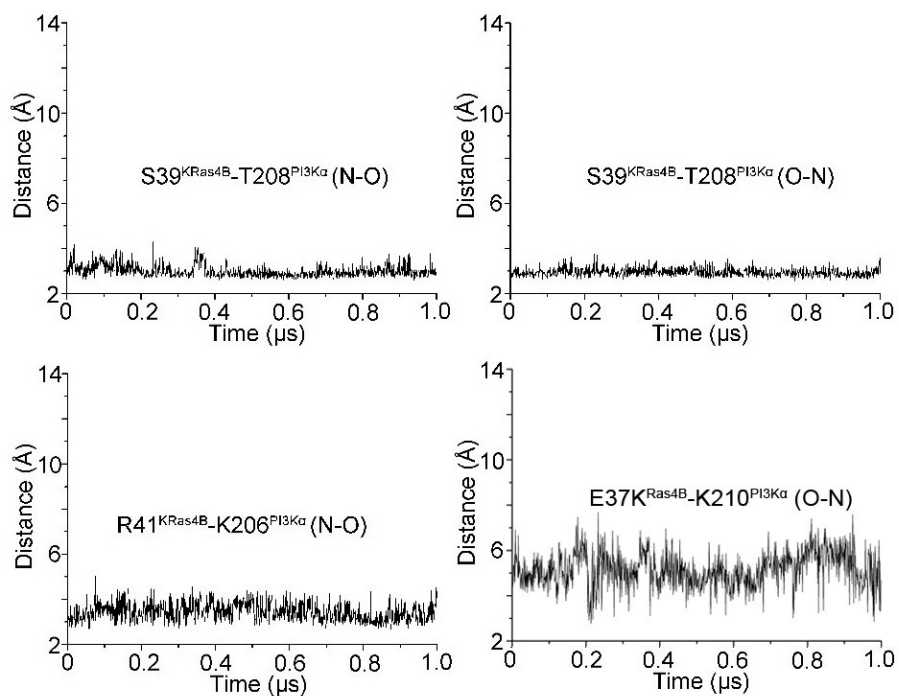

Supplement: c9cp00101h1.pdf [file c9cp00101h1.pdf]
